# Supplementary material
Source: PubMed Central journal article supplement (PMC2446814)
Supplement: supp_190_13_4697__1.pdf [file supp_190_13_4697__1.pdf]

**Table S1.** Primers used in this work

| Primer name | Sequence (5'-3')                | Comments                                                                                                  |
|-------------|---------------------------------|-----------------------------------------------------------------------------------------------------------|
| resA-3'     | CGCGGATCCTCATCCCGAAGTCTCTCCGGG  | For amplification of bp 90 - 537 of <i>resA</i> from pRAN1Es and cloning into pLUT191, generating pLUDL01 |
| resA-5'     | CGGGGTACCTTTGCCGGCAAAGAGAGTATAT |                                                                                                           |
| resA17      | GATAAGCTTGAATGGATCTGCAATAGGGG   | For amplification of wild-type <i>resA</i> and cloning into pUC18, generating pALR9                       |
| resA18      | ACTCTAGACTTGCTTCATCCCGAAGTCTC   |                                                                                                           |
| resA9       | GGGGTACATGGGCTGAACCGTGCAAAAAAG  | For Cys74 →Ala mutagenesis using pALR9 as template, generating pALR33                                     |
| resA10      | CTTTTTTGCACGGTTCAGCCCATGTACCCC  |                                                                                                           |
| resA11      | ATGGTGTGAACCGGCCAAAAAAGAGTTTCC  | For Cys77 →Ala mutagenesis using pALR9 as template, generating pALR32                                     |
| resA12      | GGAAACTCTTTTTTGGCCGGTTCACACCCAT |                                                                                                           |
| resA13      | ATGGGCTGAACCGGCCAAAAAAGAGTTTCC  | For Cys77 →Ala mutagenesis using pALR33 (C74A encoding mutant) as template, generating pALR36             |
| resA14      | GGAAACTCTTTTTTGGCCGGTTCAGCCCAT  |                                                                                                           |
| res7        | CCGTGCAAAAAACAATTCCTTATATG      | For Glu80 →Gln mutagenesis using pALR9 as template, generating pALR37                                     |
| res8        | CATATAAGGAAATTGTTTTTGCACGG      |                                                                                                           |
| res17       | GTATCTCCGCTTTTCGACAACCTTTTTG    | For Pro141 →Ser mutagenesis using pALR9 as template, generating pCHN1                                     |
| res18       | CAAAAAGGTTGTTCGAAAGCGGAGATAC    |                                                                                                           |
| res19       | GTATCTCCGCTTACGACAACCTTTTTG     | For Pro141 →Thr mutagenesis using pALR9 as template, generating pCHN3                                     |
| res20       | CAAAAAGGTTGTTCGTAAGCGGAGATAC    |                                                                                                           |
